# Supplementary material
Source: Research Square preprint supplement (doi:10.21203/rs.3.rs-9619074/v1)
Supplement: Supplementary file 1 [file 036b81e57cb443e37db81b90.xlsx]

## Sheet: Data Extraction
DATA EXTRACTION FORM — 26 Included Studies | Complete one row per paper
Study ID	Authors (Surname et al.)	Year	Full Title	Journal / Conference	DOI / URL	Study Design	Bioinformatics Domain	AI / ML Method	Workflow Manager Used	Deployment Context	RQ Addressed (1-5)	Primary Outcome Metric	Precision (%)	Recall (%)	F1 Score (%)	MTTR Reduction (%)	Reprod. Improvement	Quality Score (0-10)	Key Limitations & Notes
1	Kapoor S et al.	2023	Reproducibility standards for machine learning in the life sciences	Nature Machine Intelligence / ACM 2023		Survey/Review	General bioinformatics	Survey of reproducibility standards and benchmarking frameworks for ML in life sciences	General ML pipelines in life sciences	N/A — review paper	RQ5	Reproducibility metrics; benchmarking standards; replication rates in ML life sciences papers					Less than 33% of ML life sciences studies are reproducible; proposes standardized evaluation frameworks	8	Highly cited foundational paper for RQ5 gap analysis. Establishes the reproducibility crisis context. Key reference for Introduction and Discussion sections.
2	Unknown	2022	Addressing data resiliency for staging based scientific workflows	ACM SC 2022 (proceedings)		Empirical evaluation	Scientific computing	Data resiliency mechanisms for staging-based scientific workflows; fault detection and recovery for distributed pipeline staging	HPC workflow staging systems	HPC cluster environments	RQ4	Workflow reliability improvement; data loss prevention in staging failures					Addresses data consistency and reproducibility in staged workflow execution	6	Peer reviewed at SC 2022. Infrastructure pattern for fault-tolerant workflow staging. Not AI-driven but relevant to RQ4 as baseline comparison. Full text needed for precise metrics.
3	Unknown	2022	Kubernetes Scheduling: Taxonomy, Ongoing Issues and Challenges	ACM 2022		Survey/Review	Scientific computing	Taxonomy of Kubernetes scheduling approaches including ML-based schedulers for scientific workloads	Kubernetes-orchestrated scientific pipelines	Cloud and HPC Kubernetes clusters	RQ4	Taxonomy of scheduling approaches; identifies ML-based scheduling as emerging capability for scientific workflows						6	Review/taxonomy paper. Relevant to RQ4 infrastructure patterns. Kubernetes is core infrastructure for containerized bioinformatics pipelines (Nextflow + Kubernetes). Full text needed.
4	Unknown	2023	Novel Approaches Toward Scalable Composable Workflows in Hyper-Heterogeneous Computing Environments	ACM SC 2023		Empirical evaluation	Scientific computing	Composable workflow architecture for hyper-heterogeneous computing environments; adaptive resource allocation	Composable scientific workflows across heterogeneous HPC systems	Multi-site HPC environments	RQ4	Scalability metrics across heterogeneous computing environments; workflow composition flexibility					Composable architecture supports reproducible workflow execution across different computing environments	6	Peer reviewed at SC 2023. Infrastructure scalability for scientific workflows. Relevant to RQ4. Full text needed for specific performance metrics.
5	Unknown	2024	LLM4Workflow: An LLM-based Automated Workflow Model Generation Tool	ACM 2024		Proof of concept	General bioinformatics	LLM-based automated workflow model generation from natural language descriptions	Not specified	Not specified	RQ1	Workflow generation accuracy; correctness of generated workflow models					Automated generation reduces manual workflow construction time	5	Limited detail available from abstract only. Need full text to extract precise metrics.
6	Unknown	2025	Secure API-Driven Research Automation to Accelerate Scientific Discovery	PEARC 2025 (ACM)		Case study	Scientific computing	API-driven automation framework for scientific discovery; secure programmatic access to research computing resources	Research computing pipelines via API orchestration	Advanced research computing infrastructure	RQ4	Acceleration of scientific discovery; reduced manual coordination overhead					API-driven workflows improve reproducibility through programmatic, version-controlled pipeline execution	6	PEARC 2025 peer reviewed. Research computing automation via APIs. Infrastructure pattern paper. Full text needed for specific metrics.
7	Unknown	2025	AI Agents for Enabling Autonomous Experiments at ORNL's HPC and Manufacturing User Facilities	SC Workshops 2025 (XLOOP workshop, ACM)	https://dl.acm.org/doi/10.1145/3731599.3767592	Proof of concept	Scientific computing	Multi-agent framework with LLM natural language interface, programmable facility APIs, Flowcept provenance-aware infrastructure; CrewAI for agent orchestration; S3M service mesh for HPC-edge coordination	ORNL INTERSECT SDK; edge-cloud-HPC workflow; additive manufacturing + HPC simulation pipelines	ORNL Manufacturing Demonstration Facility + Leadership Computing Facility; edge-cloud-HPC continuum	RQ2	Reduction in coordination overhead; acceleration of scientific discovery process; end-to-end workflow evaluated via simulated manufacturing facility					Provenance-aware infrastructure captures W3C PROV-compliant workflow traces; supports reproducible and explainable autonomous experiments	7	DOE-funded national lab deployment — high credibility. Peer reviewed at SC25 workshops. Not bioinformatics-specific but directly demonstrates multi-agent HPC workflow automation with provenance tracking. Limitations: simulated facility evaluation, not fully operational.
8	Unknown	2025	The (R)evolution of Scientific Workflows in the Agentic AI Era: Towards Autonomous Science	SC Workshops 2025 (ACM)	https://dl.acm.org/doi/10.1145/3731599.3767580	Survey/Review	Scientific computing	Conceptual framework using state machine abstraction to model workflow evolution from static DAGs to intelligent multi-agent swarms; architectural blueprint for autonomous science	Agnostic — covers Nextflow, Snakemake, CWL, and custom HPC workflow managers	N/A — conceptual framework paper; evaluated against existing workflow system taxonomy	RQ2+RQ5	Architectural blueprint for evolving workflow systems; identifies evolutionary path from static to intelligent-swarm workflows; projects 10-100x discovery acceleration potential					Identifies fault tolerance and provenance as critical gaps in current workflow systems for autonomous science	8	Peer reviewed at SC25. From ORNL researchers — high authority. Key reference for RQ2 and RQ5. Identifies exact gap your review addresses: lack of intelligent fault-tolerant coordination in current workflow systems. Strong theoretical foundation paper.
9	Nellutla N et al.	2025	NoOps for AI: Fully Autonomous ML Pipelines Using Serverless Cloud Functions	IEEE GCWCN 2025		Proof of concept	General data pipeline	Fully autonomous ML pipeline orchestration using serverless cloud functions; automated scaling, monitoring, and remediation without human operators	Serverless cloud ML pipelines (AWS Lambda / similar)	Serverless cloud environment	RQ4	Pipeline autonomy level; operational overhead reduction; automated failure recovery rate					Serverless architecture provides immutable, reproducible pipeline execution environments	5	Proof of concept — limited empirical validation. Relevant to RQ4 infrastructure automation patterns. Not bioinformatics-specific. Full text needed.
10	Verma P et al.	2025	AI-Driven Observability for Real-Time Incident Management	IEEE ICRTEECT 2025		Empirical evaluation	Healthcare IT	AI-driven observability using Prometheus + BigPanda integration; ML-powered anomaly detection and alert correlation; automated MTTR reduction	CI/CD pipelines; distributed healthcare IT systems	Cloud-native; enterprise IT environments	RQ1+RQ3	MTTR reduction; alert noise reduction; incident detection accuracy				40		6	IT infrastructure focus — transferable to scientific pipelines but not bioinformatics-specific. Reports ~40% MTTR reduction. Alert noise reduced by 75% in one case study. Peer reviewed.
11	Unknown	2025	Beyond ETL: Architecting Resilient Intelligent Data Workflows for Distributed AI Systems	IEEE 2025		Proof of concept	General data pipeline	AI-driven resilient data workflow architecture beyond traditional ETL; intelligent fault detection and adaptive data routing	Distributed AI system data workflows	Distributed AI computing environments	RQ4	Data workflow resilience metrics; fault tolerance improvement over traditional ETL						5	Limited abstract information available. General data pipeline focus — not bioinformatics-specific. Relevant to RQ4 as infrastructure pattern. Full text needed.
12	Carnevale L et al.	2025	Private Distributed Resource Management: Predicting CPU Utilization with Bi-LSTM and Federated Learning	IEEE CCGrid 2025		Empirical evaluation	Scientific computing	Bi-LSTM neural network for CPU utilization prediction in distributed resource management; federated learning for privacy-preserving cross-site training	HPC resource management systems	Distributed HPC clusters with federated learning	RQ1	CPU utilization prediction accuracy; proactive resource management enabling pipeline failure prevention					Federated learning preserves data privacy across institutional boundaries for cross-site scientific computing	7	Peer reviewed at CCGrid 2025. Federated learning angle is particularly relevant for multi-site genomics/bioinformatics. Predictive resource management directly prevents pipeline failures. Cited 1 time.
13	Gwinn J et al.	2025	A Workflow for Error Analysis for Drug Response Prediction via Statistical Standardization	SC Workshops 2025 (IEEE)		Case study	Genomics	Statistical standardization and distribution analysis for error detection in scientific HPC workflows; ML-based error pattern identification	Drug response prediction pipeline on HPC (ALCF supercomputer)	Argonne Leadership Computing Facility (ALCF) HPC	RQ1+RQ4	Error detection accuracy; workflow reliability improvement; error analysis methodology for scientific pipelines					Systematic error analysis methodology improves pipeline reliability and reproducibility for scientific workflows	7	Peer reviewed at SC25. Real HPC deployment at national lab. Drug response prediction = biomedical pipeline directly relevant to review scope. Authors: Justin Wozniak (ALCF), Rick Stevens (Argonne) — high credibility.
14	Satyanarayanan A	2022	Foundational Framework Self-Healing Data Pipelines for AI Engineering	International Journal of AI, Data Science, and Machine Learning 2022	https://ijaidsml.org/	Proof of concept	General data pipeline	Self-healing architecture for AI engineering data pipelines; automated fault detection and correction; pipeline health monitoring with ML-based anomaly detection	AI/ML engineering data pipelines	Cloud-based AI/ML infrastructure	RQ3+RQ4	Framework architecture completeness; self-healing success rate; fault detection coverage					Self-healing mechanisms improve pipeline reliability and consistency for AI engineering workflows	5	Cited 18 times — well-cited for journal tier. Foundational architecture paper for self-healing data pipelines. Not bioinformatics-specific but directly relevant methodology. Full text needed for precise metrics.
15	Bradfield E et al.	2025	Generative AI for Pipeline Repair: Automating Corrective Actions in Self-Healing Data Systems	ResearchGate preprint 2025	https://www.researchgate.net/publication/	Proof of concept	General data pipeline	Generative AI for automated corrective actions in self-healing data systems; LLM-driven pipeline repair and fault detection	Data pipelines (AI/ML workflows)	Not specified	RQ1+RQ3	Pipeline repair success rate; automation rate of corrective actions						5	Preprint, cited 6 times. Directly addresses GenAI pipeline repair. Not bioinformatics-specific but highly relevant methodology. Need full text for precise metrics.
16	Chakraborty S	2025	Beyond ETL: How AI Agents Are Building Self-Healing Data Pipelines	Journal of Computer Science and Technology 2025		Proof of concept	General data pipeline	AI agents for building self-healing data pipelines; automated ETL repair and adaptation using agent-based monitoring and remediation	Data pipeline automation systems	Cloud data platform environments	RQ2+RQ3	Pipeline repair success rate; reduction in manual ETL maintenance; self-healing coverage						5	Cited 53 times — most-cited paper in this batch, indicating high community interest. General data pipeline focus. Agent-based self-healing methodology directly transferable to bioinformatics pipelines. Full text needed.
17	Hughes A; Luke A	2024	The Impact of Self-Healing Data Pipelines on Performance and Fairness of AI Models in Production	ResearchGate preprint 2024		Empirical evaluation	General data pipeline	Self-healing data pipeline mechanisms and their downstream impact on AI model performance metrics and fairness in production environments	Production AI/ML data pipelines	Enterprise production AI environments; CI/CD pipeline integration	RQ3+RQ5	AI model performance improvement from self-healing pipelines; fairness metric impact; CI/CD reliability improvement					Self-healing pipelines improve reproducibility of AI model training through consistent data quality	5	Preprint — not peer reviewed. Unique angle: examines how self-healing pipelines affect downstream AI model fairness and performance. Relevant to RQ3 (governance) and RQ5 (gap: fairness in bioinformatics). Full text needed.
18	Anand S; Sharma S	2024	Self-Healing Data Pipelines for Handling Anomalies in Medicaid and CHIP Data Processing	International Journal of AI, BigData, Computational and Management Studies 2024		Case study	Healthcare IT	Anomaly detection, workflow automation, and self-healing mechanisms for healthcare data pipeline management	Medicaid and CHIP data processing pipelines	Healthcare data processing environment	RQ1+RQ3	Error detection and correction rates; pipeline reliability improvement						6	Peer reviewed journal. Healthcare-specific self-healing pipeline. Strong governance angle (regulatory compliance for Medicaid data). Cited 17 times.
19	Dovzhenko VO et al.	2020	AI-Augmented Monitoring of Bioinformatics Pipelines Using Shell-Based Frameworks	ResearchGate preprint 2020	https://www.researchgate.net/publication/	Proof of concept	General bioinformatics	AI-augmented shell script monitoring framework for bioinformatics pipelines; anomaly detection, resource forecasting, and self-healing capabilities integrated with Unix shell-based workflow execution	Unix shell-based bioinformatics pipelines (NGS workflows)	Unix/Linux HPC environments running omics analysis workflows	RQ1	Anomaly detection accuracy; resource forecasting capability; self-healing intervention success rate					Automated monitoring improves pipeline reliability and reproducibility for bioinformatics workflows	5	MOST DIRECTLY RELEVANT paper to review topic — explicitly addresses AI monitoring of bioinformatics pipelines. Published 2020 (earliest paper in review). Preprint — not peer reviewed. Full text difficult to locate. Shell-based approach may be outdated vs. current container-native approaches.
20	Bhaskar D et al.	2025	AI for Predictive Server Failures in Healthcare UNIX Infrastructures	ResearchGate preprint 2025		Case study	Healthcare IT	AI predictive failure detection for healthcare UNIX infrastructure; ML models for server failure prediction in bioinformatics pipeline environments; self-healing infrastructure with digital twins	Healthcare UNIX server infrastructure supporting bioinformatics pipelines	Healthcare UNIX/Linux servers running bioinformatics analysis	RQ1+RQ4	Server failure prediction accuracy; MTTR reduction; infrastructure availability improvement					Predictive maintenance reduces unexpected pipeline interruptions, improving workflow reproducibility	5	Cited 1 time. Healthcare UNIX infrastructure focus bridges bioinformatics and clinical IT. Mentions bioinformatics pipeline monitoring explicitly. Preprint. Full text needed for metrics.
21	Alam M et al.	2026	Adaptive Evolution-Inspired Algorithm for Intrusion Detection in Bioinformatics Systems	Informatics for Health and Bioinformatics (SAGE) 2026		Empirical evaluation	General bioinformatics	Evolutionary algorithm-inspired intrusion detection system for bioinformatics pipeline security; GA-inspired self-learning and self-healing mechanisms; ML-based anomaly detection on workflow logs mimicking GA4GH and NIH SRA pipelines	GA4GH and NIH SRA bioinformatics pipeline patterns	Bioinformatics cloud infrastructure with security monitoring	RQ1	Intrusion detection accuracy; anomaly detection precision/recall for bioinformatics-specific traffic					Adaptive self-healing characteristics improve pipeline security and reliability for bioinformatics workflows	6	Published 2026 — most recent paper in review. Peer reviewed in SAGE bioinformatics journal. Directly addresses bioinformatics-specific anomaly detection with GA4GH/NIH SRA pipelines. Security angle is unique in this review. Full text needed for precise metrics.
22	Wang Y; Wang J	2025	BioWorkflow: Retrieving Comprehensive Bioinformatics Workflows from Publications	Briefings in Bioinformatics, Vol. 26, Issue 6, Nov 2025	https://doi.org/10.1093/bib/bbaf571	Empirical evaluation	General bioinformatics	LLM-based RAG framework with hierarchical query decomposition, multimodal PDF parsing (text + tables + figures), iterative query refinement, and automated consistency checks for workflow extraction from publications	BCO-compliant JSON output; compatible with published bioinformatics pipelines	Evaluated on 100 expert-annotated bioinformatics articles; local and cloud deployment	RQ1+RQ5	Workflow step recall (~80% vs ~20% for baseline), reproducibility/completeness/accuracy improvement >20% over GPT-o4-mini, curation time reduction from hours to 3-5 min per paper		80			Curation time reduced from >60 min to 3-5 min per paper; >20% improvement in reproducibility over state-of-the-art LLM baselines	9	Peer reviewed in top-tier bioinformatics journal (Briefings in Bioinformatics). Strongest methodological paper in review. Reports precision, recall, F1 for workflow step extraction. Directly addresses RQ1 and reproducibility gap (RQ5).
23	Hou YF et al.	2025	MARWA: Multi-Agent Retrieval-Augmented Framework for Reliable Bioinformatics Workflow Automation	OpenReview (under review) 2025	https://openreview.net/forum?id=EcbUaXJb9s	Empirical evaluation	Multi-omics	Multi-agent RAG framework with LLM-based tool retrieval and contrastive learning for bioinformatics workflow automation	Custom pipeline (FASTQ/BAM workflows; genome assembly, RNA-seq)	Local and cloud servers; evaluated on curated and large-scale benchmarks	RQ2	Workflow pass rate (automation success), workflow quality score, scalability across task types					Outperforms baselines on 40 curated + 2270 large-scale tasks; step-by-step error handling at each pipeline stage	7	Under peer review — not yet published. Strong empirical evaluation with two-stage benchmark. Limitation: evaluated on tool-command generation, not full pipeline fault recovery. No MTTR metric reported.
24	Gu Y et al.	2025	Large Language Models for Constructing and Optimizing Machine Learning Workflows: A Survey	ACM Transactions on Software Engineering 2025	https://dl.acm.org/doi/10.1145/	Survey/Review	General bioinformatics	Survey of LLM approaches for constructing and optimizing ML workflows; covers data engineering, model selection, hyperparameter optimization, and workflow evaluation	ML pipeline construction and optimization workflows	N/A — survey paper	RQ1+RQ5	Taxonomy of LLM workflow construction approaches; gaps in bioinformatics-specific evaluation; cited 19 times indicating community impact					Identifies reproducibility as key gap in LLM-constructed ML workflows	7	Peer reviewed in ACM Transactions. Cited 19 times. Strong survey covering LLM workflow construction — closely related to your review scope. Identifies gaps that your review addresses for bioinformatics specifically. Key reference for RQ1 and Discussion.
25	Alam K; Roy B	2025	From Prompt to Pipeline: Large Language Models for Scientific Workflow Development in Bioinformatics	arXiv preprint 2025	https://arxiv.org/abs/2507.20122	Empirical evaluation	General bioinformatics	LLMs (multiple models evaluated) for scientific workflow development; automatic logging of analysis steps for reproducibility	Nextflow-compatible; bioinformatics analysis pipelines	Cloud-based; evaluated across multiple LLM backends	RQ1+RQ2	Workflow quality along 3 dimensions; reproducibility and portability of generated pipelines					Automatic logging of analysis steps; evaluates reproducibility and portability explicitly as outcome measures	7	Preprint. Directly addresses RQ1 and RQ2. Evaluates multiple LLMs. Limitation: workflow correctness vs. execution reliability not fully separated.
26	Su H et al.	2025	BioMaster: Multi-Agent System for Automated Bioinformatics Analysis Workflow	bioRxiv preprint 2025	https://www.biorxiv.org/content/10.1101/2025.01.23.634608v1	Empirical evaluation	Multi-omics	Multi-agent framework with dual RAG system (domain knowledge + tool-specific), Debug Agent for real-time error detection and correction, GPT-4 LLM backend	RNA-seq, ChIP-seq, single-cell analysis, Hi-C processing (18 omics modalities, 102 bioinformatics tools)	Local and cloud servers; benchmarked on 49 tasks across 18 omics modalities	RQ2	Workflow completion rate across 49 tasks; accuracy, efficiency, scalability vs. baseline automated systems					Significantly outperforms existing automated systems, particularly for complex interdependent pipelines. Debug Agent enables iterative error recovery.	8	Preprint — not peer reviewed. Strongest multi-agent bioinformatics system found in review. Covers error recovery explicitly. Limitation: GPT-4 dependent, cost implications for large-scale use. No MTTR reported.

## Sheet: Extraction Guide
DATA EXTRACTION GUIDE — How to fill each column
Column	What to Extract	Example / Notes
Authors	Last name of first author + et al. if >2 authors. If single author, full surname.	Alam K; Roy B OR Satyanarayanan A
Year	Year of publication or preprint posting.	2025
Full Title	Copy exact title from paper.	From Prompt to Pipeline: Large Language Models...
Journal / Conference	Full journal name or conference acronym + year.	Briefings in Bioinformatics 2025 OR SC '25
DOI / URL	Paste DOI (doi:10.xxxx) or full URL to paper.	https://arxiv.org/abs/2507.20122
Study Design	Select from dropdown. Choose the BEST fit: • Empirical evaluation = tested a system with measured outcomes • Benchmarking = compared multiple approaches • Case study = real-world deployment report • Proof of concept = prototype with limited evaluation • Survey/Review = synthesized existing literature • Observational before-after = compared metrics before/after intervention	Empirical evaluation
Bioinformatics Domain	Select the primary domain. If paper covers multiple, select Multi-omics or General bioinformatics.	Genomics
AI / ML Method	Describe the specific AI/ML approach used. Be specific.	LLM-based log parsing using GPT-4 OR Multi-agent RAG framework OR Bi-LSTM anomaly detection
Workflow Manager Used	Name the specific workflow tool if mentioned.	Nextflow OR Snakemake OR Galaxy OR Not specified
Deployment Context	Where was the system tested/deployed?	AWS cloud HPC cluster OR Local HPC (SLURM) OR Kubernetes OR Not specified
RQ Addressed	Which of your 5 research questions does this paper primarily address? Select from dropdown.	RQ1 = LLM log parsing RQ2 = Multi-agent orchestration RQ3 = Governance/HITL RQ4 = Infrastructure patterns RQ5 = Gaps/benchmarks
Primary Outcome Metric	What is the MAIN performance metric reported?	F1 score for log parsing OR MTTR reduction % OR Workflow success rate OR Reproducibility score
Precision (%)	If paper reports precision for detection/classification. Leave blank if not reported.	94.5
Recall (%)	If paper reports recall. Leave blank if not reported.	91.2
F1 Score (%)	If paper reports F1 score. Leave blank if not reported.	92.8
MTTR Reduction (%)	If paper reports reduction in Mean Time to Recovery or similar recovery time metric.	55
Reproducibility Improvement	Any quantitative measure of improved pipeline reproducibility. Can be free text.	Increased from 67% to 94% run success rate
Quality Score (0-10)	Your overall assessment of study quality: 10 = Excellent: rigorous methods, large dataset, validated results, peer-reviewed 7-9 = Good: solid methods, reasonable evaluation 4-6 = Moderate: some methodological weaknesses 1-3 = Poor: limited evaluation, no validation Use the MMAT criteria from your PROSPERO registration.	7
Key Limitations & Notes	Record: (1) main limitations stated by authors, (2) any concerns you have about quality, (3) any additional relevant details not captured elsewhere.	Single dataset evaluation; no comparison baseline; preprint not peer reviewed

## Sheet: RQ Mapping
RESEARCH QUESTION MAPPING — Pre-assigned RQ for each included study
Study ID	Title (short)	Suggested RQ	Rationale
1	Reproducibility standards for ML in life sciences	RQ5	Addresses benchmarking gaps and reproducibility standards
2	Data resiliency for staging based scientific workflows	RQ4	Infrastructure pattern for fault-tolerant workflow staging
3	Kubernetes Scheduling: Taxonomy, Issues and Challenges	RQ4	Container orchestration infrastructure for pipeline deployment
4	Scalable Composable Workflows in Hyper-Heterogeneous Environments	RQ4	Workflow infrastructure scalability and composability patterns
5	LLM4Workflow: LLM-based Workflow Model Generation Tool	RQ1	LLM applied directly to workflow automation and generation
6	Secure API-Driven Research Automation for Scientific Discovery	RQ4	Infrastructure automation for scientific research pipelines
7	AI Agents for Autonomous Experiments at ORNL HPC	RQ2	Multi-agent AI for autonomous scientific workflow management
8	Revolution of Scientific Workflows in Agentic AI Era	RQ2+RQ5	Multi-agent workflows + identifies future research gaps
9	NoOps for AI: Autonomous ML Pipelines — Serverless	RQ4	Fully autonomous infrastructure patterns for ML pipelines
10	AI-Driven Observability for Real-Time Incident Management	RQ1+RQ3	Log monitoring + governance/HITL for incident response
11	Beyond ETL: Resilient Intelligent Data Workflows	RQ4	Infrastructure patterns for resilient distributed data workflows
12	CPU Utilization Prediction with Bi-LSTM and Federated Learning	RQ1	ML-based anomaly detection for distributed computing resources
13	Workflow for Error Analysis for Drug Response Prediction	RQ1+RQ4	Workflow error analysis methodology + HPC infrastructure
14	Foundational Framework: Self-Healing Data Pipelines for AI Eng	RQ3+RQ4	Framework architecture + governance for self-healing pipelines
15	Generative AI for Pipeline Repair: Self-Healing Data Systems	RQ1+RQ3	GenAI for automated pipeline repair + remediation governance
16	Beyond ETL: AI Agents Building Self-Healing Data Pipelines	RQ2+RQ3	AI agent orchestration + governance for pipeline self-healing
17	Impact of Self-Healing Pipelines on AI Model Performance	RQ3+RQ5	Governance outcomes + identifies fairness/performance gaps
18	Self-Healing Pipelines for Medicaid and CHIP Data Processing	RQ1+RQ3	Anomaly detection + governance in regulated healthcare context
19	AI-Augmented Monitoring of Bioinformatics Pipelines — Shell	RQ1	Direct application to bioinformatics pipeline monitoring
20	AI for Predictive Server Failures in Healthcare UNIX	RQ1+RQ4	Predictive failure detection + healthcare UNIX infrastructure
21	Adaptive Evolution Algorithm: Intrusion Detection in Bioinformatics	RQ1	Anomaly/intrusion detection in bioinformatics system pipelines
22	BioWorkflow: Retrieving Bioinformatics Workflows from Publications	RQ1+RQ5	LLM for workflow extraction + reproducibility gaps
23	MARWA: Multi-Agent RAG for Bioinformatics Workflow Automation	RQ2	Core multi-agent framework for bioinformatics workflow automation
24	LLMs for Constructing and Optimizing ML Workflows: A Survey	RQ1+RQ5	LLM workflow construction survey + identifies research gaps
25	From Prompt to Pipeline: LLMs for Scientific Workflow Dev	RQ1+RQ2	LLM workflow development + orchestration in bioinformatics
26	BioMaster: Multi-Agent System for Bioinformatics Analysis Workflow	RQ2	Core multi-agent system for automated bioinformatics workflows

## Sheet: Quality Assessment
QUALITY ASSESSMENT — MMAT Adapted for Computational Studies
ID	Title (short)	Q1 Clear Objective?	Q2 Approp. Study Design?	Q3 Sufficient Evaluation Data?	Q4 Outcomes Measured Reliably?	Q5 Comparator Used?	Q6 Results Reproducible?	Q7 Limitations Discussed?	Total Score (/7)
1	Reproducibility standards for machine lear...	Yes							1
2	Addressing data resiliency for staging bas...								0
3	Kubernetes Scheduling: Taxonomy, Ongoing I...								0
4	Novel Approaches Toward Scalable Composabl...								0
5	LLM4Workflow: An LLM-based Automated Workf...								0
6	Secure API-Driven Research Automation to A...								0
7	AI Agents for Enabling Autonomous Experime...								0
8	The (R)evolution of Scientific Workflows i...								0
9	NoOps for AI: Fully Autonomous ML Pipeline...								0
10	AI-Driven Observability for Real-Time Inci...								0
11	Beyond ETL: Architecting Resilient Intelli...								0
12	Private Distributed Resource Management: P...								0
13	A Workflow for Error Analysis for Drug Res...								0
14	Foundational Framework Self-Healing Data P...								0
15	Generative AI for Pipeline Repair: Automat...								0
16	Beyond ETL: How AI Agents Are Building Sel...								0
17	The Impact of Self-Healing Data Pipelines ...								0
18	Self-Healing Data Pipelines for Handling A...								0
19	AI-Augmented Monitoring of Bioinformatics ...								0
20	AI for Predictive Server Failures in Healt...								0
21	Adaptive Evolution-Inspired Algorithm for ...								0
22	BioWorkflow: Retrieving Comprehensive Bioi...								0
23	MARWA: Multi-Agent Retrieval-Augmented Fra...								0
24	Large Language Models for Constructing and...								0
25	From Prompt to Pipeline: Large Language Mo...								0
26	BioMaster: Multi-Agent System for Automate...								0
SCORING GUIDE
Q1: Is the research objective clearly stated? Yes = explicit aim/hypothesis stated
Q2: Is the study design appropriate for the objective? Yes = method fits the research question
Q3: Is the evaluation dataset/corpus sufficient? Yes = adequate scale, diversity, or real-world data
Q4: Are outcomes measured reliably? Yes = reproducible metrics, defined calculation methods
Q5: Is a comparator or baseline used? Yes = compared against manual, rule-based, or alternative AI approach
Q6: Are results reproducible? Yes = code/data available, or sufficient detail to reproduce
Q7: Are limitations explicitly discussed? Yes = authors acknowledge scope, generalizability, or method limitations
TOTAL SCORE: 6-7 = High quality | 4-5 = Moderate | 2-3 = Low | 0-1 = Very low

## Sheet:  Synthesis Matrix
SYNTHESIS MATRIX — Evidence map across Research Questions
Study ID	Short Title	RQ1 LLM/Log Parsing	RQ2 Multi-Agent Orchest.	RQ3 Governance /HITL	RQ4 Infrastructure Patterns	RQ5 Gaps/ Benchmarks	Notes
1	Reproducibility standards for machine lear...	✓				✓
2	Addressing data resiliency for staging bas...				✓
3	Kubernetes Scheduling: Taxonomy, Ongoing I...				✓
4	Novel Approaches Toward Scalable Composabl...				✓
5	LLM4Workflow: An LLM-based Automated Workf...	✓
6	Secure API-Driven Research Automation to A...				✓
7	AI Agents for Enabling Autonomous Experime...		✓
8	The (R)evolution of Scientific Workflows i...		✓			✓
9	NoOps for AI: Fully Autonomous ML Pipeline...				✓
10	AI-Driven Observability for Real-Time Inci...	✓		✓
11	Beyond ETL: Architecting Resilient Intelli...				✓
12	Private Distributed Resource Management: P...	✓
13	A Workflow for Error Analysis for Drug Res...	✓			✓
14	Foundational Framework Self-Healing Data P...			✓	✓
15	Generative AI for Pipeline Repair: Automat...	✓		✓
16	Beyond ETL: How AI Agents Are Building Sel...		✓	✓
17	The Impact of Self-Healing Data Pipelines ...			✓		✓
18	Self-Healing Data Pipelines for Handling A...	✓		✓
19	AI-Augmented Monitoring of Bioinformatics ...	✓
20	AI for Predictive Server Failures in Healt...	✓			✓
21	Adaptive Evolution-Inspired Algorithm for ...	✓
22	BioWorkflow: Retrieving Comprehensive Bioi...	✓				✓
23	MARWA: Multi-Agent Retrieval-Augmented Fra...		✓
24	Large Language Models for Constructing and...	✓				✓
25	From Prompt to Pipeline: Large Language Mo...	✓	✓
26	BioMaster: Multi-Agent System for Automate...		✓
Papers per RQ (count)		RQ1 n=13	RQ2 n=6	RQ3 n=6	RQ4 n=9	RQ5 n=5
