# Supplementary material
Source: Research Square preprint supplement (doi:10.21203/rs.3.rs-9619074/v1)
Supplement: Supplementary file 2 [file 37c0b5001486d4a7d41c660f.xlsx]

## Sheet: Screening Log
SYSTEMATIC REVIEW SCREENING LOG — AI-Driven Self-Healing Bioinformatics Pipelines
ID	Title	Authors	Year	Database	Source URL	Abstract Available?	Stage 1 Title Screen	Stage 1 Reason if Excluded	Stage 2 Full Text	Stage 2 Reason if Excluded	Final Decision	AI Method	Workflow Tool	Primary Outcome	Notes / Quality Score
1	AMAnD: an automated metagenome anomaly detection methodology utilizing DeepSVDD neural networks	Unknown	2024	ACM		Yes	Exclude	Detects anomalies IN biological/genomic data, not pipeline infrastructure			EXCLUDE
2	Reproducibility standards for machine learning in the life sciences	Unknown	2023	ACM		Yes	Include				INCLUDE
3	E-ABIN: an explainable module for anomaly detection in biological networks	Unknown	2023	ACM		Yes	Exclude		Exclude	E-ABIN detects anomalies in biological network data — not pipeline infrastructure	EXCLUDE
4	Building Tapis v3 Streams API Support for Real-Time Streaming Data Event-Driven Workflows	Unknown	2023	ACM		Yes	Exclude	Not bioinformatics or pipeline automation — environmental science analytics			EXCLUDE
5	Report from the second workshop on scalable workflow enactment engines and technology (SWEET'13)	Unknown	2022	ACM		Yes	Exclude	Anomaly detection in biological network data, not pipeline infrastructure			EXCLUDE
6	Data Analytics for Environmental Science and Engineering Research	Unknown	2023	ACM		Yes	Exclude	Biological data analysis (proteomics differential analysis), not pipeline management			EXCLUDE
7	Network-based anomaly detection algorithm reveals proteins with major roles in human tissues	Unknown	2024	ACM		Yes	Exclude	Biological data analysis (proteomics), not pipeline infrastructure			EXCLUDE
8	Unsupervised Machine Learning for Differential Analysis in Proteomics	Unknown	2023	ACM		Yes	Exclude	Healthcare analytics deployment, not bioinformatics pipeline infrastructure			EXCLUDE
9	Releasing eHealth Analytics into the Wild	Unknown	2025	ACM		Yes	Exclude		Exclude	eHealth Analytics deployment paper — not pipeline automation infrastructure	EXCLUDE
10	AI-Enabled Orchestration of Event-Driven Business Processes in Workday ERP for Healthcare	Monu Sharma	2025	arXiv	arXiv:2511.15852	Yes	Maybe	ERP workflow orchestration — retrieve full text to confirm pipeline infrastructure focus	Exclude	Full text confirms: ERP financial/supply-chain workflow automation. No bioinformatics or scientific pipeline content.	EXCLUDE
12	Addressing data resiliency for staging based scientific workflows	Unknown	2022	ACM		Yes	Include				INCLUDE
13	Service Computing for Industry 4.0: State of the Art, Challenges, and Research Opportunities	Unknown	2022	ACM		Yes	Exclude	Industry 4.0 service computing — not bioinformatics or scientific pipeline infrastructure			EXCLUDE
14	Deriving experiments from E-SECO software ecosystem in the technology transfer process for the livestock domain	Unknown	2022	ACM		Yes	Exclude	Software ecosystem for livestock domain — not bioinformatics pipeline automation			EXCLUDE
15	SESoS 22: Software Engineering for Systems-of-Systems and Software Ecosystems (Proceedings)	Unknown	2022	ACM		Yes	Exclude	Conference proceedings volume — not a specific study			EXCLUDE
16	SC 22: International Conference on High Performance Computing, Networking, Storage and Analysis (Proceedings)	Unknown	2022	ACM		Yes	Maybe	HPC conference proceedings — retrieve specific papers from this venue	Exclude	Conference proceedings volume — no individual paper identified within scope after review of table of contents.	EXCLUDE
17	Kubernetes Scheduling: Taxonomy, Ongoing Issues and Challenges	Unknown	2022	ACM		Yes	Include				INCLUDE
18	CHI 23: CHI Conference on Human Factors in Computing Systems (Proceedings)	Unknown	2023	ACM		Yes	Exclude	HCI conference proceedings — not pipeline infrastructure automation			EXCLUDE
19	SAC 23: ACM/SIGAPP Symposium on Applied Computing (Proceedings)	Unknown	2023	ACM		Yes	Exclude	General computing conference proceedings — not specific study			EXCLUDE
20	GECCO 23 Companion: Genetic and Evolutionary Computation (Proceedings)	Unknown	2023	ACM		Yes	Exclude	Evolutionary computation conference — not pipeline automation			EXCLUDE
21	PEARC 23: Practice and Experience in Advanced Research Computing (Proceedings)	Unknown	2023	ACM		Yes	Maybe	Advanced research computing — retrieve specific papers on workflow automation	Exclude	Conference proceedings volume — no individual paper identified within scope after review of table of contents.	EXCLUDE
22	SC 23: International Conference for High Performance Computing (Proceedings)	Unknown	2023	ACM		Yes	Maybe	HPC conference proceedings — likely contains relevant workflow papers	Exclude	Conference proceedings volume — individual papers from SC23 already captured via direct searches.	EXCLUDE
23	Novel Approaches Toward Scalable Composable Workflows in Hyper-Heterogeneous Computing Environments	Unknown	2023	ACM		Yes	Include				INCLUDE
24	SC-W 23: SC 23 Workshops on High Performance Computing (Proceedings)	Unknown	2023	ACM		Yes	Maybe	HPC workshops proceedings — retrieve specific workflow automation papers	Exclude	Conference proceedings volume — no individual paper identified within scope.	EXCLUDE
25	SIGSPATIAL 23: ACM International Conference on Advances in Geographic Information Systems (Proceedings)	Unknown	2023	ACM		Yes	Exclude	Geographic information systems — not bioinformatics or scientific pipeline automation			EXCLUDE
26	UCC 24: IEEE/ACM International Conference on Utility and Cloud Computing (Proceedings)	Unknown	2024	ACM		Yes	Maybe	Cloud computing conference — likely contains relevant pipeline fault tolerance papers	Exclude	Conference proceedings volume — no individual paper identified within scope.	EXCLUDE
27	ACMSE 24: ACM Southeast Conference (Proceedings)	Unknown	2024	ACM		Yes	Exclude	General computing conference proceedings — not specific study			EXCLUDE
28	ICPE 24 Companion: International Conference on Performance Engineering (Proceedings)	Unknown	2024	ACM		Yes	Maybe	Performance engineering — may contain pipeline monitoring papers, retrieve specific studies	Exclude	Conference proceedings volume — no individual paper identified within scope.	EXCLUDE
29	CAIN 24: IEEE/ACM International Conference on AI Engineering — Software Engineering for AI (Proceedings)	Unknown	2024	ACM		Yes	Exclude		Exclude	Conference proceedings volume — CAIN 24, not individual paper	EXCLUDE
30	ACM REP 24: ACM Conference on Reproducibility and Replicability (Proceedings)	Unknown	2024	ACM		Yes	Exclude		Exclude	Conference proceedings volume — ACM REP 24, not individual paper	EXCLUDE
31	LLM4Workflow: An LLM-based Automated Workflow Model Generation Tool	Unknown	2024	ACM		Yes	Include				INCLUDE
32	MProt-DPO: Breaking the EasyPOs Barrier for Multimodal Protein Design Workflows with Direct Preference Optimization	Unknown	2024	ACM		Yes	Exclude	Protein design optimization — biological data analysis not pipeline infrastructure automation			EXCLUDE
33	SC-W 24: SC 24 Workshops on High Performance Computing (Proceedings)	Unknown	2024	ACM		Yes	Maybe	HPC workshops — retrieve specific self-healing/workflow automation papers	Exclude	Conference proceedings volume — no individual paper identified within scope.	EXCLUDE
34	EuroSys 25: Twentieth European Conference on Computer Systems (Proceedings)	Unknown	2025	ACM		Yes	Maybe	Systems conference — may contain relevant fault tolerance and pipeline automation papers	Exclude	Conference proceedings volume — no individual paper identified within scope.	EXCLUDE
35	ICPE 25: ACM/SPEC International Conference on Performance Engineering (Proceedings)	Unknown	2025	ACM		Yes	Maybe	Performance engineering — may contain pipeline monitoring papers	Exclude	Conference proceedings volume — no individual paper identified within scope.	EXCLUDE
36	SSDBM 25: International Conference on Scalable Scientific Data Management (Proceedings)	Unknown	2025	ACM		Yes	Exclude		Exclude	Conference proceedings volume — SSDBM 25, not individual paper	EXCLUDE
37	ISCCN 25: International Conference on Intelligent Systems, Communications and Computer Networks (Proceedings)	Unknown	2025	ACM		Yes	Exclude	General intelligent systems conference — not specific to scientific pipeline automation			EXCLUDE
38	Secure API-Driven Research Automation to Accelerate Scientific Discovery	Unknown	2025	ACM		Yes	Include				INCLUDE
39	PEARC 25: Practice and Experience in Advanced Research Computing 2025 (Proceedings)	Unknown	2025	ACM		Yes	Maybe	Advanced research computing — retrieve specific workflow automation papers	Exclude	Conference proceedings volume — no individual paper identified within scope.	EXCLUDE
40	ACM REP 25: ACM Conference on Reproducibility and Replicability (Proceedings)	Unknown	2025	ACM		Yes	Exclude		Exclude	Conference proceedings volume — ACM REP 25, not individual paper	EXCLUDE
41	CUG 25: Cray User Group (Proceedings)	Unknown	2025	ACM		Yes	Maybe	Cray HPC systems — may contain relevant large-scale workflow automation papers	Exclude	Conference proceedings volume — no individual paper identified within scope.	EXCLUDE
42	AI Agents for Enabling Autonomous Experiments at ORNLs HPC and Manufacturing User Facilities	Unknown	2025	ACM		Yes	Include				INCLUDE
43	The (R)evolution of Scientific Workflows in the Agentic AI Era: Towards Autonomous Science	Unknown	2025	ACM		Yes	Include				INCLUDE
44	SC Workshops 25: SC 25 Workshops on High Performance Computing (Proceedings)	Unknown	2025	ACM		Yes	Maybe	HPC workshops — retrieve specific self-healing workflow papers	Exclude	Conference proceedings volume — no individual paper identified within scope.	EXCLUDE
45	SC 25: International Conference for High Performance Computing (Proceedings)	Unknown	2025	ACM		Yes	Maybe	HPC conference — likely contains relevant workflow automation papers	Exclude	Conference proceedings volume — no individual paper identified within scope.	EXCLUDE
46	ICPP Workshops 25: Workshop Proceedings of the International Conference on Parallel Processing	Unknown	2025	ACM		Yes	Maybe	Parallel processing workshops — may contain relevant pipeline scheduling papers	Exclude	Conference proceedings volume — no individual paper identified within scope.	EXCLUDE
47	ICPP 25: Proceedings of the International Conference on Parallel Processing	Unknown	2025	ACM		Yes	Maybe	Parallel processing — may contain pipeline fault tolerance papers	Exclude	Conference proceedings volume — no individual paper identified within scope.	EXCLUDE
48	UCC 25: IEEE/ACM International Conference on Utility and Cloud Computing (Proceedings)	Unknown	2025	ACM		Yes	Maybe	Cloud computing — retrieve specific pipeline automation papers	Exclude	Conference proceedings volume — no individual paper identified within scope.	EXCLUDE
49	SoCC 25: ACM Symposium on Cloud Computing (Proceedings)	Unknown	2025	ACM		Yes	Maybe	Cloud computing — likely contains relevant self-healing infrastructure papers	Exclude	Conference proceedings volume — no individual paper identified within scope.	EXCLUDE
50	SCA/HPCAsia 26: Supercomputing Asia and High Performance Computing Asia Pacific (Proceedings)	Unknown	2026	ACM		Yes	Maybe	HPC Asia proceedings — retrieve specific scientific workflow papers	Exclude	Conference proceedings volume — no individual paper identified within scope.	EXCLUDE
51	CSAI 25: International Conference on Computer Science and Artificial Intelligence (Proceedings)	Unknown	2025	ACM		Yes	Exclude	General CS/AI conference — not specific to scientific pipeline automation			EXCLUDE
52	ICHDS 25: International Conference on Public Health and Data Science	Unknown	2025	ACM		Yes	Exclude	Public health and data science conference — not scientific pipeline automation			EXCLUDE
53	IHM 25: International Conference on Health Informatics and Data Analysis	Unknown	2025	ACM		Yes	Exclude	Health informatics — clinical focus, not bioinformatics pipeline infrastructure			EXCLUDE
54	WWW 25 Companion: ACM on Web Conference 2025	Unknown	2025	ACM		Yes	Exclude	Web conference — not relevant to scientific pipeline automation			EXCLUDE
55	HINNULI 26: Human-Computer Interaction, Neural Networks and Deep Learning	Unknown	2026	ACM		Yes	Exclude	HCI and neural networks — not pipeline infrastructure automation			EXCLUDE
56	ICCST 25: International Conference on Computer Science and Information Technology	Unknown	2025	ACM		Yes	Exclude	General CS conference — not specific to scientific pipeline automation			EXCLUDE
57	ESEC/FSE 2025: Software Engineering and Foundations of Software Engineering	Unknown	2025	ACM		Yes	Maybe	Software engineering — may contain pipeline fault tolerance or AI remediation papers	Exclude	Conference proceedings volume — no individual paper identified within scope.	EXCLUDE
58	LISAI 25: International Conference on Digital Society and Artificial Intelligence	Unknown	2025	ACM		Yes	Exclude	Digital society and AI — not bioinformatics pipeline infrastructure			EXCLUDE
59	SC 25: International Conference for High Performance Computing (Proceedings)	Unknown	2025	ACM		Yes	Maybe	Already in list — HPC conference, retrieve specific workflow automation papers	Exclude	Duplicate entry — SC25 already listed as ID 45.	EXCLUDE
60	MM 24: ACM International Conference on Multimedia	Unknown	2024	ACM		Yes	Exclude	Multimedia conference — not relevant to scientific pipeline automation			EXCLUDE
61	ARES 25: International Conference on Availability, Reliability and Security	Unknown	2025	ACM		Yes	Maybe	Availability and reliability — may contain fault tolerance and self-healing pipeline papers	Exclude	Conference proceedings volume — no individual paper identified within scope.	EXCLUDE
62	PEARC 25: Practice and Experience in Advanced Research Computing 2025	Unknown	2025	ACM		Yes	Maybe	Already in list — advanced research computing, retrieve specific workflow papers	Exclude	Duplicate entry — PEARC25 already listed as ID 39.	EXCLUDE
63	MSCEIS 25: International Conference on Management Science and Computer Engineering	Unknown	2025	ACM		Yes	Exclude	Management science and engineering — not bioinformatics pipeline automation			EXCLUDE
64	SSDBM 25: International Conference on Scalable Scientific Data Management	Unknown	2025	ACM		Yes	Maybe	Already in list — scientific data management, retrieve specific pipeline papers	Exclude	Duplicate entry — SSDBM25 already listed as ID 36.	EXCLUDE
65	PEARC 23: Practice and Experience in Advanced Research Computing 2023	Unknown	2023	ACM		Yes	Maybe	Already in list — advanced research computing, retrieve specific workflow papers	Exclude	Duplicate entry — PEARC23 already listed as ID 21.	EXCLUDE
66	SC Workshops 25: SC 25 Workshops on High Performance Computing	Unknown	2025	ACM		Yes	Maybe	Already in list — HPC workshops, retrieve specific self-healing workflow papers	Exclude	Duplicate entry — SC Workshops 25 already listed as ID 44.	EXCLUDE
67	SAC 23: ACM/SIGAPP Symposium on Applied Computing	Unknown	2023	ACM		Yes	Exclude	Already excluded — general computing conference proceedings			EXCLUDE
68	CUG 25: Cray User Group	Unknown	2025	ACM		Yes	Maybe	Already in list — Cray HPC systems, retrieve relevant workflow papers	Exclude	Duplicate entry — CUG25 already listed as ID 41.	EXCLUDE
69	PDP 25: Euromicro Conference on Parallel, Distributed and Network-Based Processing	Unknown	2025	ACM		Yes	Maybe	Parallel and distributed processing — may contain pipeline scheduling and fault tolerance papers	Exclude	Conference proceedings volume — no individual paper identified within scope.	EXCLUDE
70	ISCA 25: Annual International Symposium on Computer Architecture	Unknown	2025	ACM		Yes	Exclude	Computer architecture — hardware focus, not pipeline automation software			EXCLUDE
71	ASPLOS 25 Vol 1: Architectural Support for Programming Languages and Operating Systems	Unknown	2025	ACM		Yes	Exclude	Systems architecture conference — hardware/OS focus, not scientific pipeline automation			EXCLUDE
72	ASPLOS 25 Vol 2: Architectural Support for Programming Languages and Operating Systems	Unknown	2025	ACM		Yes	Exclude	Systems architecture conference — hardware/OS focus, not scientific pipeline automation			EXCLUDE
73	MMS 23: International Conference on Publish and Indigenous Multimedia	Unknown	2023	ACM		Yes	Exclude	Indigenous multimedia conference — completely unrelated			EXCLUDE
74	TMS 25: ACM SIGecom Workshop on Economics of Information Security	Unknown	2025	ACM		Yes	Exclude	Information security economics — not pipeline automation			EXCLUDE
75	CHI 24: CHI Conference on Human Factors in Computing Systems	Unknown	2024	ACM		Yes	Exclude	HCI conference — not pipeline infrastructure automation			EXCLUDE
76	CHI 23: CHI Conference on Human Factors in Computing Systems	Unknown	2023	ACM		Yes	Exclude	Already excluded — HCI conference, not pipeline automation			EXCLUDE
77	A Business Workflow Architecture for Predictive Maintenance using Real-Time Anomaly Prediction On Streaming IoT Data	Gultekin E; Aktas MS	2022	IEEE		Yes	Exclude	IoT predictive maintenance workflow — not bioinformatics or scientific computing pipeline			EXCLUDE
78	Optimizing Big Data Workflows Using AI and Machine Learning	Murumkar S; Tayal C	2026	IEEE		Yes	Maybe	Big data workflow optimization with AI — may be applicable to scientific computing pipelines, retrieve full text	Exclude	Full text confirms: general big data workflow optimization for business analytics. No scientific computing or bioinformatics pipeline context.	EXCLUDE
79	GO-MAF: A Human-in-the-Loop Multi-Agent Framework for Self-Healing 5/6G Network Operations	An R et al.	2025	IEEE		Yes	Exclude	Self-healing 5G/6G network operations — telecommunications not scientific pipeline infrastructure			EXCLUDE
80	AI-Driven Self-Healing in Cloud-Native 6G Networks Through Dynamic Server Scaling	Giannopoulos A et al.	2025	IEEE		Yes	Exclude	Self-healing 6G cloud networks — telecommunications not bioinformatics pipelines			EXCLUDE
81	NoOps for AI: Fully Autonomous ML Pipelines Using Serverless Cloud Functions	Nellutla N et al.	2025	IEEE		Yes	Include				INCLUDE
82	Resource reliability using fault tolerance in cloud computing	Charity TJ; Hua GC	2016	IEEE		Yes	Exclude	Published 2016 — outside date range (before January 2019)			EXCLUDE
83	Quantum Chemical Investigation of Thermotropic Ionic Liquid Crystals to Predict Phase Transition Temperatures	Makara E	2023	IEEE		Yes	Exclude	Chemistry/materials science — completely unrelated to pipeline automation			EXCLUDE
84	GenAI-Powered Autonomous Test Automation for Mission-Critical Online Booking Systems	Krishnamoorthy D et al.	2025	IEEE		Yes	Exclude	Test automation for online booking systems — commercial software not scientific pipelines			EXCLUDE
85	AI-Driven Observability for Real-Time Incident Management	Verma P et al.	2025	IEEE		Yes	Maybe	AI observability and incident management — potentially transferable to scientific pipeline monitoring, retrieve full text	Include	Full text confirms: AI-driven observability for pipeline monitoring using Prometheus+BigPanda with MTTR metrics. Directly transferable to scientific pipeline monitoring.	INCLUDE
86	Beyond ETL: Architecting Resilient Intelligent Data Workflows for Distributed AI Systems	Unknown	2025	IEEE		Yes	Include				INCLUDE
87	Enhanced Anomaly Detection in Automotive Systems Using SAAD	Goina D et al.	2024	IEEE		Yes	Exclude	Automotive systems anomaly detection — not scientific computing pipelines			EXCLUDE
88	Accordion AutoEncoders (A2E) for Generative Classification with Low Complexity Network	Kelso K; Lee BK	2021	IEEE		Yes	Exclude	Neural network architecture — not pipeline automation or fault detection			EXCLUDE
89	Towards Practical onboard PHM System for Aircraft Engines	Cao J et al.	2022	IEEE		Yes	Exclude	Aircraft engine health monitoring — not scientific computing pipelines			EXCLUDE
90	Investigations on IoT Security System using Machine Learning Algorithm	Shali A; Chinnasamy A	2022	IEEE		Yes	Exclude	IoT security — not bioinformatics or scientific pipeline automation			EXCLUDE
91	Detection of Malicious Activities Using Machine Learning in Physical Environments	Hsu TY; Tang CY	2022	IEEE		Yes	Exclude	Physical environment malicious activity detection — not pipeline automation			EXCLUDE
92	Anomalous Detection System in Crowded Environment using Deep Learning	Esan DO et al.	2020	IEEE		Yes	Exclude	Crowd anomaly detection — not scientific computing pipeline infrastructure			EXCLUDE
93	Intelligent and Optimized Deep Learning Techniques for Analyzing IoMT-Based Remote Patient Monitoring	Johar S; Manjula GR	2024	IEEE		Yes	Exclude	Patient monitoring IoMT — clinical device monitoring not pipeline automation			EXCLUDE
94	Trustworthy AI for Modbus/TCP Intrusion Detection in Industrial Control Systems	Tawfik M; Badawy W	2025	IEEE		Yes	Exclude	Industrial control system intrusion detection — not scientific pipeline automation			EXCLUDE
95	A Literature Survey of Defending Cyber Attacks Targeting IoT in Critical Infrastructure	Al-Sinayyid A et al.	2023	IEEE		Yes	Exclude	IoT cybersecurity survey — not pipeline automation or bioinformatics			EXCLUDE
96	CLPL: A Self-supervised Contrastive Learning Pseudo-Labeling Framework for Tabular Data	Farahani A et al.	2022	IEEE		Yes	Exclude	Tabular data ML framework — not pipeline infrastructure automation			EXCLUDE
97	Mechanical Anomaly Detection on an Embedded Microcontroller	Lord M; Kaplan A	2021	IEEE		Yes	Exclude	Embedded microcontroller anomaly detection — hardware not scientific pipelines			EXCLUDE
98	Comparative Analysis of LSTM and CNN for Efficient Malware Detection	Osamor F; Wellman B	2022	IEEE		Yes	Exclude	Malware detection — cybersecurity not pipeline automation			EXCLUDE
99	Detection and Classification of Anomalies in Internet of Vehicles using CNNs	Hade P; Waghmare K	2022	IEEE		Yes	Exclude	Internet of Vehicles anomaly detection — automotive not scientific pipelines			EXCLUDE
100	Unveiling the Digital Shadows: Comprehensive Exploration of Network Forensics Methodologies	Nandini DSJ et al.	2024	IEEE		Yes	Exclude	Network forensics — cybersecurity not pipeline automation			EXCLUDE
101	Ada-Thres: An Adaptive Thresholding Method To Mitigate False Alarms	Soni J et al.	2022	IEEE		Yes	Exclude	Generic thresholding method — no bioinformatics or scientific pipeline context			EXCLUDE
102	Private Distributed Resource Management Data: Predicting CPU Utilization with Bi-LSTM and Federated Learning	Carnevale L et al.	2025	IEEE		Yes	Include				INCLUDE
103	A Workflow for Error Analysis for Drug Response Prediction via Statistical Standardization	Gwinn J et al.	2025	IEEE		Yes	Include				INCLUDE
104	Hands-On Data Analysis with Pandas (Book)	Unknown	2023	IEEE		Yes	Exclude	Book/textbook — not an empirical study, excluded by study type criteria			EXCLUDE
105	Foundational Framework Self-Healing Data Pipelines for AI Engineering: A Framework and Implementation	Satyanarayanan A	2022	Google Scholar		Yes	Include				INCLUDE
106	GENERATIVE AI FOR PIPELINE REPAIR: AUTOMATING CORRECTIVE ACTIONS IN SELF-HEALING DATA SYSTEMS	Bradfield E; Woo K; Adebayo Y	2025	Google Scholar		Yes	Include				INCLUDE
107	Beyond ETL: How AI Agents Are Building Self-Healing Data Pipelines	Chakraborty S	2025	Google Scholar		Yes	Include				INCLUDE
108	Artificial intelligence for self-healing automation testing frameworks: Real-time fault prediction and recovery	Nama P; Reddy P; Pattanayak SK	2024	Google Scholar		Yes	Maybe	Self-healing test automation frameworks — relevant methodology but testing focus not pipeline infrastructure, retrieve full text	Exclude	Full text confirms: self-healing for UI test automation in software testing. Testing framework not scientific pipeline infrastructure.	EXCLUDE
109	The Impact of Self-Healing Data Pipelines on the Performance and Fairness of AI Models in Production	Hughes A; Luke A	2024	Google Scholar		Yes	Include				INCLUDE
110	Self-Healing Data Pipelines for Handling Anomalies in Medicaid and CHIP Data Processing	Anand S; Sharma S	2024	Google Scholar		Yes	Include				INCLUDE
111	AI-Augmented Monitoring of Bioinformatics Pipelines Using Shell-Based Frameworks	Dovzhenko VO et al.	2020	Google Scholar		Yes	Include				INCLUDE
112	AI for Predictive Server Failures in Healthcare UNIX Infrastructures	Bhaskar D et al.	2025	Google Scholar		Yes	Include				INCLUDE
113	TOWARDS NEXT-GENERATION AUTOMATION: DATA-DRIVEN SYNERGIES OF AI AND ROBOTICS THROUGH DATA ENGINEERING AND DATA SCIENCE	Iqbal MW et al.	2025	Google Scholar		Yes	Exclude	AI and robotics data engineering — broad scope not specific to scientific pipeline automation			EXCLUDE
114	Adaptive Evolution-Inspired Algorithm for Intrusion Detection in Bioinformatics Systems	Alam M et al.	2026	Google Scholar		Yes	Include				INCLUDE
115	BioWorkflow: Retrieving comprehensive bioinformatics workflows from publications	Wang Y; Wang J	2025	Google Scholar		Yes	Include				INCLUDE
116	MARWA: Multi-agent retrieval-augmented framework for reliable bioinformatics workflow automation	Hou YF et al.	2025	Google Scholar		Yes	Include				INCLUDE
117	Large language models for constructing and optimizing machine learning workflows: A survey	Gu Y et al.	2025	Google Scholar		Yes	Include				INCLUDE
118	BioLLMBench: A Comprehensive Benchmarking of Large Language Models in Bioinformatics	Mangul S et al.	2024	Google Scholar		Yes	Maybe	LLM benchmarking in bioinformatics — evaluates LLM capabilities not pipeline automation, retrieve full text to confirm	Exclude	Full text confirms: BioLLMBench evaluates LLM performance on bioinformatics analysis tasks (coding, domain knowledge, math). Not pipeline automation or infrastructure management.	EXCLUDE
119	From Prompt to Pipeline: Large Language Models for Scientific Workflow Development in Bioinformatics	Alam K; Roy B	2025	Google Scholar		Yes	Include				INCLUDE
120	BioMaster: Multi-agent system for automated bioinformatics analysis workflow	Su H et al.	2025	Google Scholar		Yes	Include				INCLUDE
121	Biollmbench: A comprehensive benchmarking of large language models in bioinformatics	Sarwal V et al.	2023	Google Scholar		Yes	Maybe	LLM benchmarking in bioinformatics — overlaps with BioLLMBench above, check for duplication and retrieve full text	Exclude	Duplicate/earlier version of BioLLMBench (ID 118). Same paper, different preprint version. Mark as duplicate.	EXCLUDE
122	Scientific Workflow Development Using Large Language Models	Alam K; Roy B	2025	Google Scholar		Yes	Maybe	Likely duplicate or preprint version of From Prompt to Pipeline paper above — check for duplication before including	Maybe	Likely preprint version of From Prompt to Pipeline (ID already included). Verify DOI before final decision — may be duplicate.	PENDING
123	Large Language Models in Bio-Ontology Research: A Review	Manda P	2025	Google Scholar		Yes	Exclude	LLMs for bio-ontology research — biological knowledge representation not pipeline automation			EXCLUDE
124	A Multimodal Machine Learning Approach for Automated Research Software Classification	Unknown	2024	Google Scholar		Yes	Maybe	Automated research software classification — potentially relevant to pipeline tool management, retrieve full text	Exclude	Full text: multimodal ML for classifying research software types. Software classification not pipeline automation or fault detection.	EXCLUDE

## Sheet: Criteria
INCLUSION & EXCLUSION CRITERIA — Quick Reference
PICOS	Inclusion Criteria	Exclusion Criteria	Notes
Population	Bioinformatics/omics computational pipelines (genomics, transcriptomics, proteomics, metagenomics). Workflow managers: Nextflow, Snakemake, Galaxy, Cromwell, CWL. HPC, cloud, or container-native environments.	General software engineering pipelines with no bioinformatics application. Non-biological data processing (financial, industrial). Studies with no pipeline/workflow component.	Focus on INFRASTRUCTURE not biological analysis
Intervention	AI/LLM-based log parsing, anomaly detection, multi-agent orchestration, automated root-cause analysis, autonomous remediation, self-healing mechanisms, AI-enhanced IaC for pipeline reproducibility.	Rule-based automation without AI/ML. AI applied solely to biological data analysis (variant calling, sequence alignment, disease prediction) without infrastructure focus.	Must involve AI/ML component applied to pipeline management
Comparator	Manual pipeline monitoring, rule-based automation, baseline pipeline without self-healing, no comparator (non-comparative studies accepted).	No specific exclusions. Non-comparative studies included given emerging field.	Comparator optional — include non-comparative studies
Outcomes	PRIMARY: Detection accuracy (precision/recall/F1), MTTR reduction, reproducibility improvement, autonomous remediation rate, system overhead. SECONDARY: Researcher trust, governance compliance, scalability, generalizability, cost efficiency.	Studies reporting only biological outcomes (disease diagnosis accuracy, variant calling accuracy) without pipeline infrastructure metrics.	Must report at least one quantitative pipeline performance metric
Study Types	Empirical evaluations, benchmarking studies, case studies with quantitative data, proof-of-concept with evaluation, observational before/after studies, conference papers, preprints with empirical findings.	Systematic reviews, narrative reviews, opinion pieces, editorials, theoretical-only papers, tutorials, grey literature without verifiable methodology.	Must have empirical evaluation component
Date Range	January 2019 to present (date of search execution).	Papers published before January 2019.	2019 = emergence of transformer-based LLMs
Language	No language restrictions. All languages accepted if abstract available in English for screening.	None.	English abstract required for screening
QUICK SCREENING DECISION GUIDE
INCLUDE if:	Paper addresses AI/ML applied to pipeline/workflow INFRASTRUCTURE automation or failure management in a scientific/bioinformatics computing context AND reports quantitative outcomes.
EXCLUDE if:	Paper applies AI/ML to BIOLOGICAL DATA ANALYSIS only (e.g., finding cancer genes, calling variants) without addressing the pipeline infrastructure that runs those analyses.
MAYBE if:	Paper partially addresses pipeline infrastructure but scope is unclear — retrieve full text before deciding.
KEY QUESTION:	Ask yourself: Is the AI helping manage/fix/monitor the PIPELINE SYSTEM, or is it analyzing the BIOLOGICAL DATA that runs through the pipeline? If the former → INCLUDE. If the latter → EXCLUDE.

## Sheet: Data Extraction
DATA EXTRACTION FORM — Complete for INCLUDED studies only
Study ID	Authors	Year	Title	Journal/ Conference	Study Type	Bioinformatics Domain	AI Method Used	Workflow Manager	Deployment Context	Primary Outcome Metric	Precision (%)	Recall (%)	F1 (%)	MTTR Reduction (%)	Reprod. Improvement	Quality Score (0-10)	Limitations Reported	Notes

## Sheet: PRISMA Tracker
PRISMA 2020 FLOW — Record Counts (Update as you screen)
IDENTIFICATION
Records from PubMed	Enter count →	0
Records from ACM Digital Library	Enter count →	69
Records from IEEE Xplore	Enter count →	28
Records from arXiv	Enter count →	10
Records from bioRxiv	Enter count →	45
Records from Google Scholar	Enter count →	20
Records from other sources	Enter count →	0
TOTAL RECORDS IDENTIFIED	172	172
SCREENING		28
Records after deduplication removed	Enter count →	0
Records screened (title/abstract)	172
Records excluded (title/abstract)	Enter count →	68
ELIGIBILITY
Full-text articles assessed	-68
Full-text excluded — wrong population	Enter count →	5
Full-text excluded — wrong intervention	Enter count →	8
Full-text excluded — wrong outcome	Enter count →	3
Full-text excluded — wrong study type	Enter count →	4
Full-text excluded — before 2019	Enter count →	2
Full-text excluded — other reason	Enter count →	6
INCLUDED
Studies included in final review	-22

## Sheet: Search Strings
SEARCH STRINGS BY DATABASE — Copy and paste directly into each database
Database	Search String	Date Executed / Results Count
PubMed (Search 1)	("bioinformatics pipeline" OR "computational pipeline" OR "workflow management" OR "scientific workflow") AND ("anomaly detection" OR "self-healing" OR "automated remediation" OR "fault detection") AND ("machine learning" OR "artificial intelligence" OR "large language model")	Date: _____ | Results: _____
PubMed (Search 2)	("bioinformatics"[MeSH] OR "computational biology"[MeSH] OR "genomics"[MeSH]) AND ("reproducibility of results"[MeSH]) AND ("artificial intelligence"[MeSH] OR "machine learning"[MeSH]) AND ("workflow" OR "pipeline" OR "automation")	Date: _____ | Results: _____
ACM Digital Library (Search 1)	"scientific workflow" AND "fault tolerance" AND ("large language model" OR "LLM" OR "generative AI" OR "multi-agent")	Date: Apr 2026 | Results: 40
ACM Digital Library (Search 2)	"bioinformatics pipeline" AND ("self-healing" OR "automated remediation" OR "fault detection") AND "machine learning"	Date: Apr 2026 | Results: 4
ACM Digital Library (Search 3)	"workflow automation" AND "anomaly detection" AND ("genomics" OR "proteomics" OR "transcriptomics" OR "computational biology")	Date: Apr 2026 | Results: 25
IEEE Xplore (Search 1)	"workflow" AND "self-healing" AND "machine learning"	Date: Apr 2026 | Results: 10
IEEE Xplore (Search 2)	"scientific computing" AND "anomaly detection" AND "deep learning"	Date: Apr 2026 | Results: 18
IEEE Xplore (Search 3)	"pipeline" AND "fault tolerance" AND ("AI" OR "artificial intelligence") AND ("bioinformatics" OR "genomics" OR "scientific workflow")	Date: _____ | Results: _____
arXiv	bioinformatics pipeline fault detection machine learning (search in cs.DC, cs.LG, q-bio.GN categories)	Date: Apr 2026 | Results: ~10
bioRxiv	"self-healing" "pipeline" "genomics"	Date: Apr 2026 | Results: 45
Google Scholar	scientific workflow self-healing machine learning bioinformatics pipeline automation	Date: _____ | Results: _____
Google Scholar (Search 2)	AI-driven fault detection automated remediation computational biology pipeline reproducibility	Date: _____ | Results: _____

## Sheet: Instructions
HOW TO USE THIS WORKBOOK
📖 INSTRUCTIONS
STEP 1 — Start with Search Strings tab	Copy each search string into the corresponding database. Record the date and result count in the third column.
STEP 2 — Import results to Screening Log	For each paper found, add a row to the Screening Log tab. Fill in ID, Title, Authors, Year, Database, and URL. Set Abstract Available = Yes/No.
STEP 3 — Stage 1 Title Screening	Read each title and set Stage 1 column to Include/Exclude/Maybe. If Exclude, record the reason. Key question: Does this paper address AI/ML for pipeline INFRASTRUCTURE management?
STEP 4 — Stage 2 Full Text	For all Include/Maybe papers, retrieve the full text. Set Stage 2 column. Record reasons for any exclusions.
STEP 5 — Final Decision	Set Final Decision to INCLUDE/EXCLUDE/PENDING. Only INCLUDE papers go to Data Extraction.
STEP 6 — Data Extraction	For each INCLUDED paper, complete a row in the Data Extraction tab. Fill in all columns including outcome metrics.
STEP 7 — Update PRISMA Tracker	Keep the PRISMA Tracker counts updated as you screen. These numbers go directly into your PRISMA flow diagram.
STEP 8 — Review Criteria	When unsure about a paper, refer to the Criteria tab for the inclusion/exclusion decision guide.
📊 WORKBOOK TABS SUMMARY
📋 Screening Log	Main working document. Add every paper found in searches here. Contains dropdown menus for decisions.
✅ Criteria	Quick reference for inclusion/exclusion decisions. Refer to this when unsure about a paper.
📊 Data Extraction	Complete this for INCLUDED papers only. These data feed your results synthesis.
🔍 PRISMA Tracker	Running count of papers at each stage. Update as you screen. Generates your PRISMA flow numbers.
🔎 Search Strings	All search strings by database with result counts. Record dates when you run each search.
⚠️ IMPORTANT NOTES
Deduplication	Before screening, check for duplicate papers (same paper indexed in multiple databases). Mark duplicates as Exclude with reason = Duplicate and count them in the PRISMA Tracker.
Intra-rater reliability	After screening 20% of papers, re-screen them after 2 weeks to check your own consistency. Calculate agreement rate.
Document everything	Record reasons for every exclusion. This becomes your supplementary data for the journal submission.
PROSPERO alignment	Your PROSPERO registration ID should be added to your manuscript once confirmed. Check email from crd-register@york.ac.uk.
